# Supplementary material
Source: PubMed Central journal article supplement (PMC2743382)
Supplement: NIHMS100321-supplement-supplement_1.pdf [file NIHMS100321-supplement-supplement_1.pdf]

concentrated in the tubule, and is less dense in the pore region. In this model, silica is initially not concentrated in one area, but becomes so over time.

**Supplemental Material Figure 1.** Rotational movie of the rimoportula. The lack of alignment between the inner and outer pores is evident, as is the location of the inner chamber of the portula situated below the outer pore.

ACCEPTED MANUSCRIPT
